# Supplementary material for: Synthesis of hierarchical porous N-doped sandwich-type carbon composites as high-performance supercapacitor electrodes
Source: Royal Society of Chemistry journal article supplement (doi:10.1039/c4ta05843g), 2014-12-16
Supplement: c4ta05843g1.pdf [file c4ta05843g1.pdf]

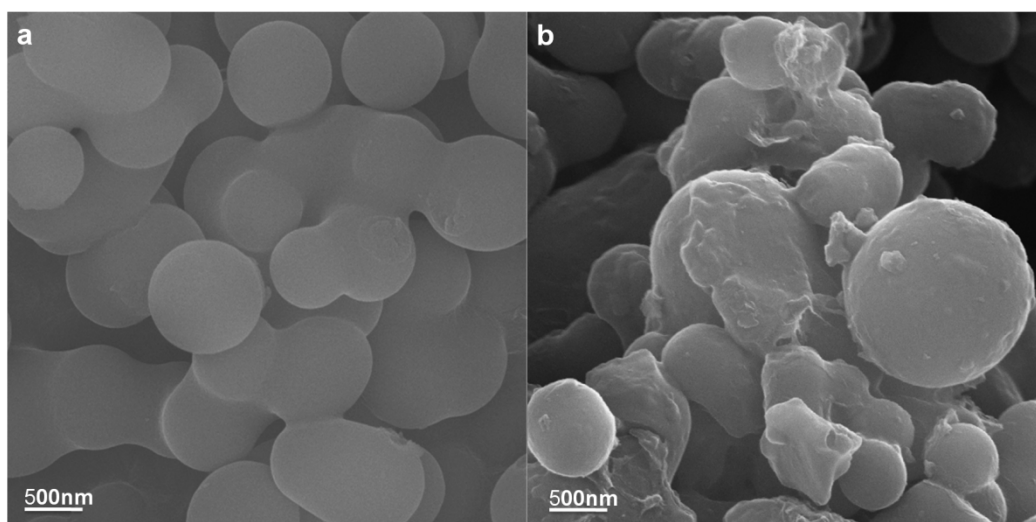

**Figure S1** SEM images of (a) Glu/EDA and (b) Glu/RGO.

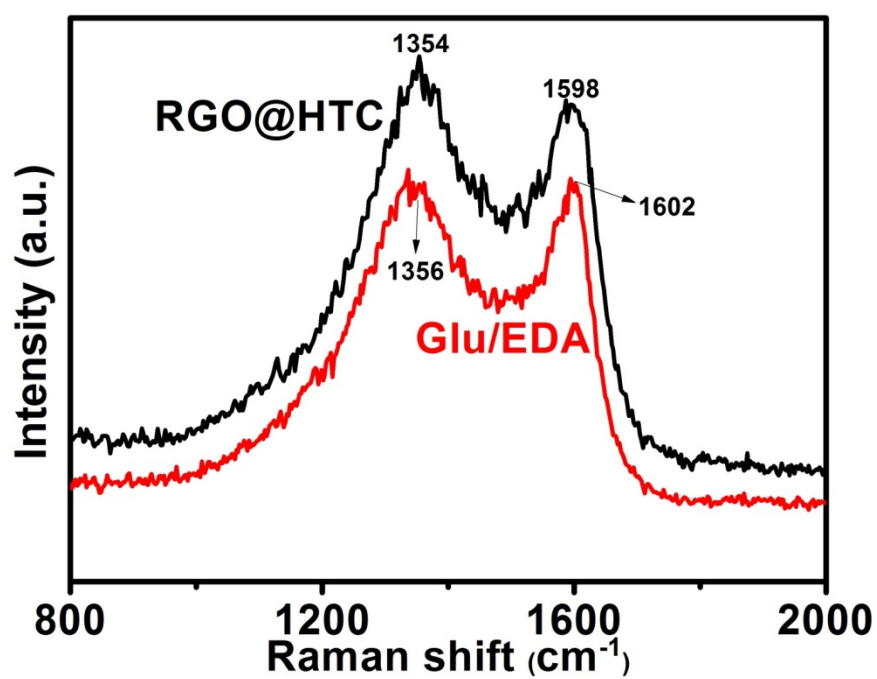

**Figure S2** Raman spectra of RGO@HTC and Glu/EDA.

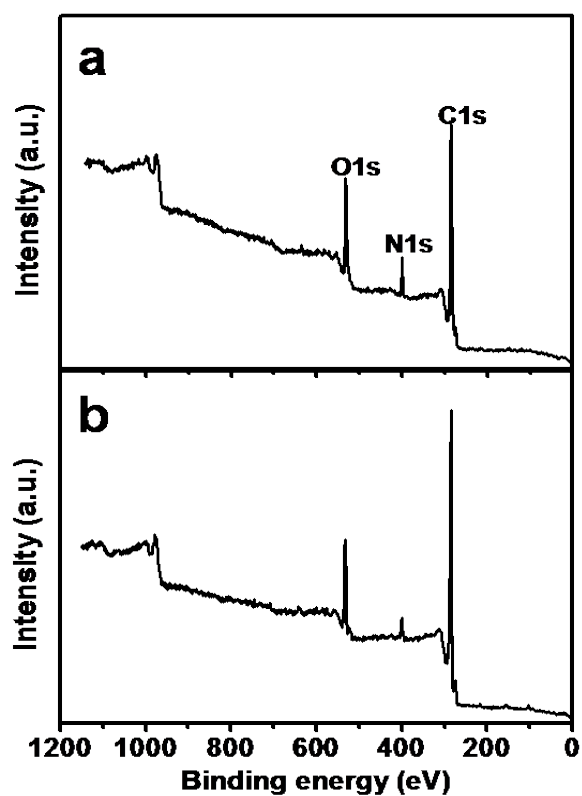

**Figure S3** Entire XPS spectra of (a) Glu/EDA and (b) RGO@HTC.

**Table S1** Mass evolutions of RGO@HTC and pure GO.

| Reactants                          | Product mass<br>after<br>hydrothermal | Product mass<br>after KOH<br>activation | GO mass percents<br>in the products |
|------------------------------------|---------------------------------------|-----------------------------------------|-------------------------------------|
| 4 g Glucose, 1 mL<br>EDA, 40 mg GO | 0.45 g                                | 0.14 g                                  | 3.6%                                |
| 200 mg GO                          | 0.1 g                                 | 0.025 g                                 | 100%                                |

**Table S2** Specific surface areas and pore properties of the carbonaceous composites activated at different Carbon/KOH mass ratios.

| Carbon/KOH   | $S_{\text{BET}}$            | Pore volume                  | Average pore size |
|--------------|-----------------------------|------------------------------|-------------------|
| weight ratio | $/\text{m}^2 \text{g}^{-1}$ | $/\text{cm}^3 \text{g}^{-1}$ | $/\text{nm}$      |
| 1:2          | 2745                        | 0.350                        | 0.67              |
| 1:1          | 1886                        | 0.164                        | 0.61              |
| 2:1          | 1749                        | 0.405                        | 0.65              |
| 3:1          | 1796                        | 0.177                        | 0.61              |
| 4:1          | 1240                        | 0.115                        | 0.62              |

**Table S3** Characteristics of N1s peaks in XPS spectra of RGO@HTC and Glu/EDA.

| Attribution  | Glu/EDA          |                       | RGO@HTC          |                       |
|--------------|------------------|-----------------------|------------------|-----------------------|
|              | Position<br>(eV) | Atomic percent<br>(%) | Position<br>(eV) | Atomic percent<br>(%) |
| Pyridine-N   | 398.5            | 11.8                  | 399.0            | 34.7                  |
| Pyrrolic-N   | 400.1            | 57.0                  | 399.9            | 37.9                  |
| Quaternary-N | 401.1            | 31.2                  | 400.8            | 27.4                  |

**Table S4** Characteristics of C1s peaks in XPS spectra of RGO@HTC and Glu/EDA.

| Attribution | Glu/EDA       |                    | RGO@HTC       |                    |
|-------------|---------------|--------------------|---------------|--------------------|
|             | Position (eV) | Atomic percent (%) | Position (eV) | Atomic percent (%) |
| C-C         | 284.8         | 62.2               | 284.7         | 66.0               |
| C-N         | 285.9         | 10.5               | 285.7         | 24.0               |
| C-O         | 286.5         | 11.5               | 286.5         | 7.2                |
| C=O         | 287.8         | 15.8               | 287.8         | 2.8                |
